# Supplementary material
Source: PubMed Central journal article supplement (PMC2427359)

monitored by stimulating cells with the addition of 1 mM CaCl<sub>2</sub> to the external medium (indicated by arrow). Averaged data and the number of cells –‘n’ imaged are shown in *D*. \*denotes values significantly different from control (P<0.05). (*E*) TIRFM images indicating YFP-STIM1<sup>D76A</sup> punctae sensitive to raft disruption. (*F*) Immunoprecipitations indicating dependency of membrane rafts for TRPC1 and STIM1<sup>D76A</sup> association. (*G*) Proposed model indicating raft recruitment of STIM1 as a step obligatory to SOCE.

### Figure Legends (Supplementary figures)

**Figure 1: Localization of STIM1 and TRPC1 in lipid rafts:** Detergent free rafts were isolated from HSG cells as described in Experimental Procedures. Individual fractions were resolved on 4-12% NuPAGE gels and Western blots were performed using respective antibodies as described above at 1:000 dilutions. Both STIM1 and TRPC1 co-migrated with the raft markers as observed in Figure 1 (main text).

**Figure 2: Lipid rafts dictates STIM1 movement and SOCE:** (*A*) Composite confocal images of HSG cells expressing YFP-STIM1 (green) along with GM1 (red, a lipid raft marker) in control and treated cells (+ 2μM Tg). (*B*) Western blots showing Tg- mediated STIM1 movement in detergent resistant raft-‘R’ fractions from MβCD or cells treated with MβCD and replenished with cholesterol (as described in experimental procedures). (*C*) TIRF imaging on HEK-293 cells expressing either a control or TRPC1-Sh-RNA. (*D*) Tg-stimulated Ca<sup>2+</sup> mobilization in control and MβCD treated HEK 293 cells.

**Figure 3: Lipid raft integrity does not effect intracellular aggregation of STIM1 or STIM1<sup>D76A</sup>:** (*A*), indicates a representative epifluorescent image of YFP-STIM1 in control and MβCD (10 mM) treated HSG cells under both control (unstimulated) or store depleted (+Tg) conditions. (*B*), indicates epifluorescent image of YFP-STIM1<sup>D76A</sup> mutant under control or MβCD treated HSG cells.

**Table 1. List of Antibodies and Supplier**

| <b>Antibody</b>                                             | <b>Supplier</b>                         |
|-------------------------------------------------------------|-----------------------------------------|
| Anti-STIM1                                                  | BD-Transduction Laboratory and Abnova   |
| Anti-TRPC1                                                  | Alemone, Sigma and Wang et al., *       |
| Anti-Caveolin1                                              | BD-Transduction Laboratories            |
| Anti-PMCA, IP3R-III                                         | Affinity BioReagents                    |
| Anti-Transferrin receptor                                   | Zymed Laboratory                        |
| Anti-SERCA2                                                 | Calbiochem                              |
| Anti-Actin, Lyn, G <sub>αq/11</sub> , Mouse IgG, Rabbit IgG | Santa Cruz Biotechnology                |
| Anti-GFP                                                    | Clontech (JL8) and Torrey Pines Biolabs |
| Choleratoxin subunit B – HRP/Alexa Fluor 594 conjugated     | Invitrogen                              |
| All secondary antibodies (HRP-conjugated)                   | Pierce                                  |

\* Wang et al., (1999). Am. J. Physiol. 276:C969-79.

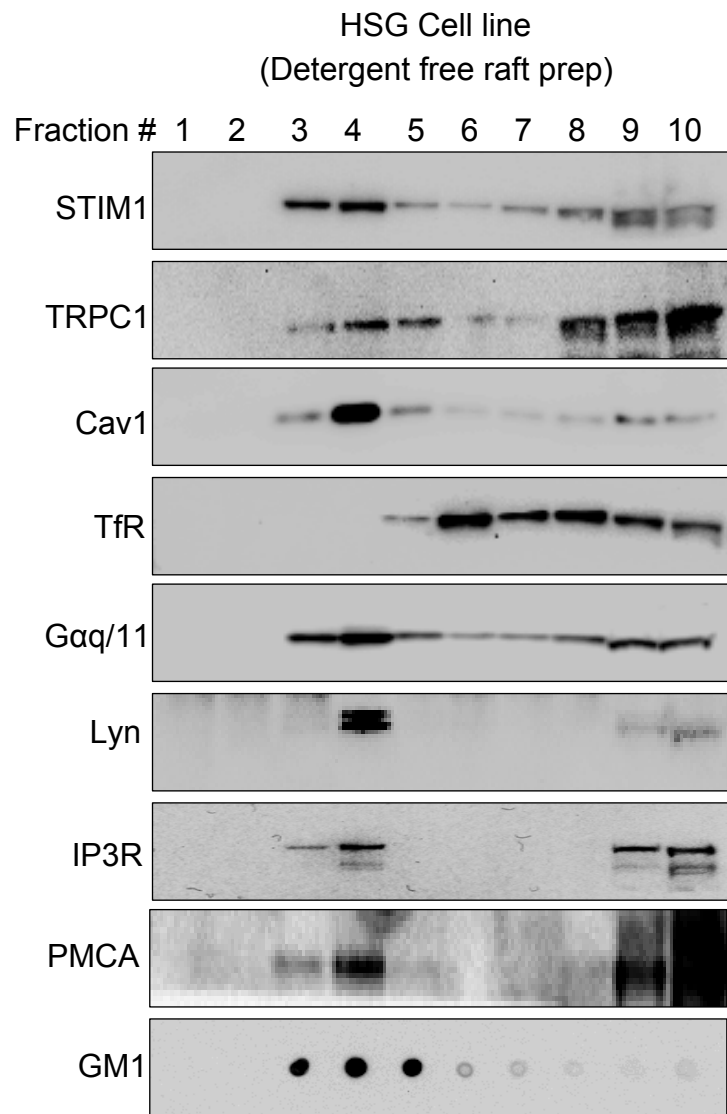

Pani et al., 2008 Supplement Fig.1

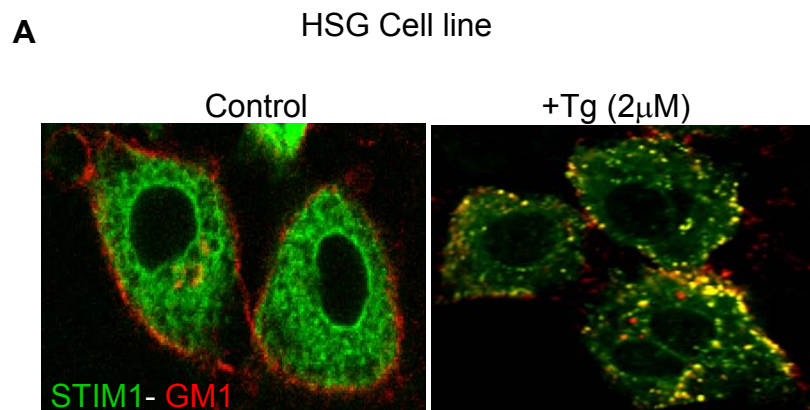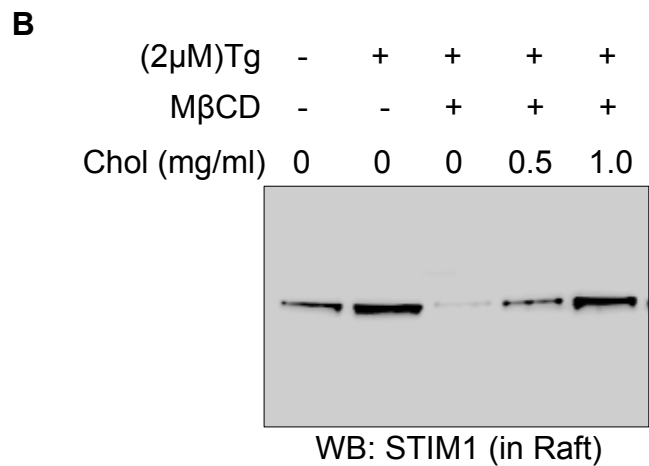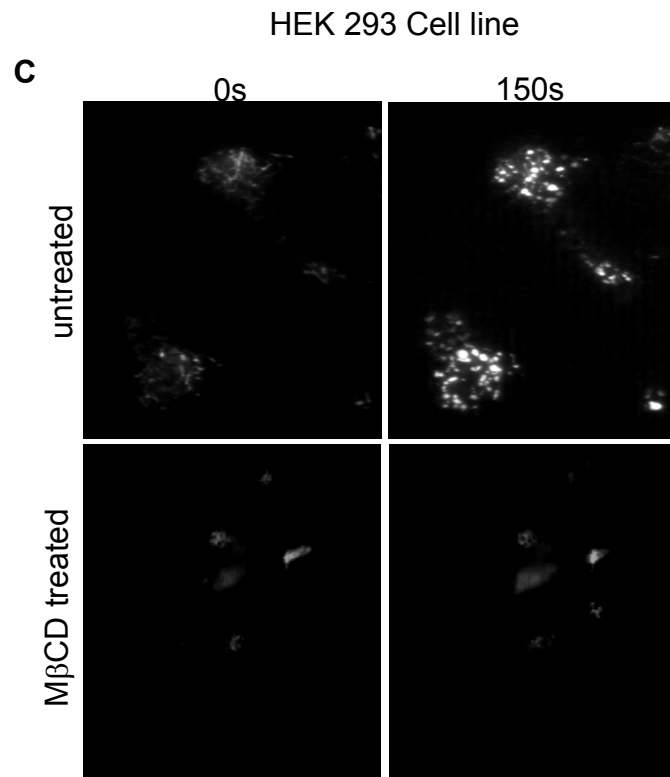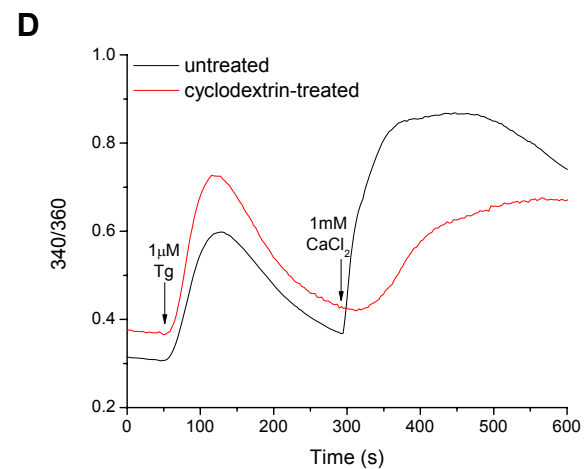

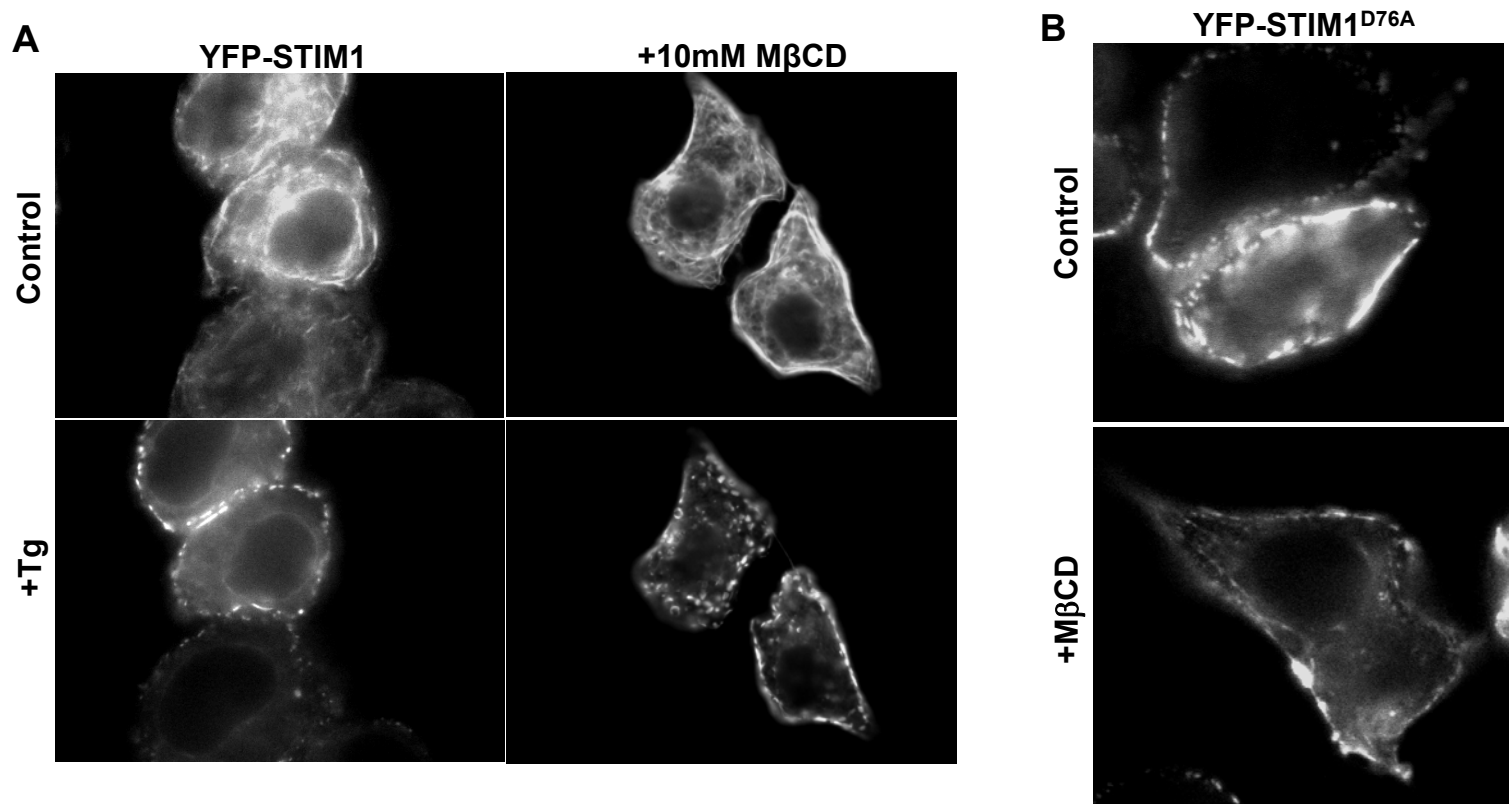

Supplement: M800107200_1.pdf [file M800107200_1.pdf]
